# Supplementary material
Source: publisher figshare collection journal article supplement (https://frontiersin.figshare.com/ndownloader/files/23178155)
Supplement: Supplementary file [file 23178155]

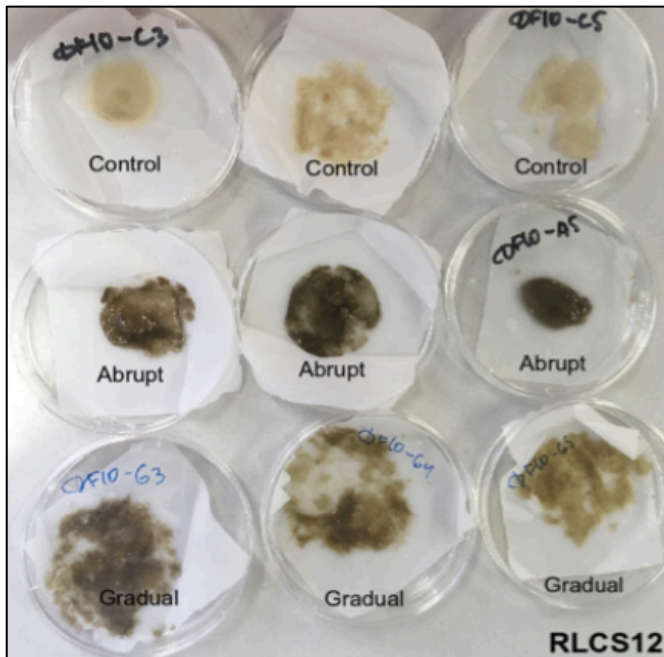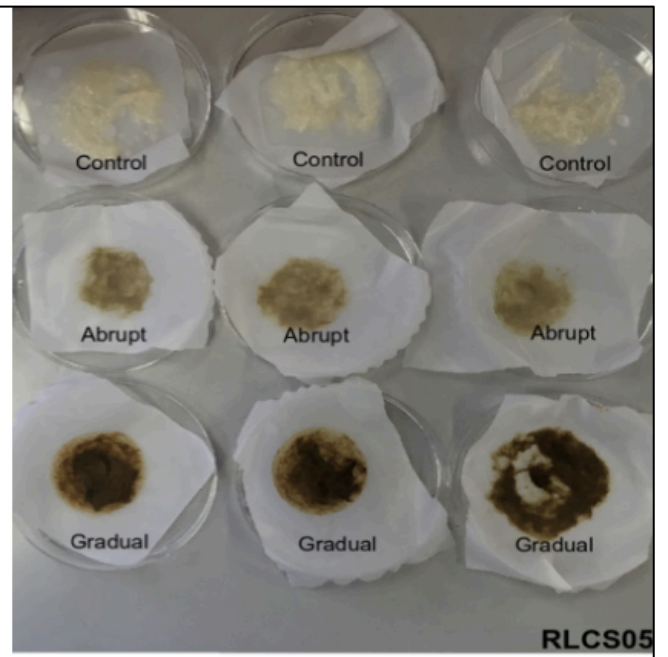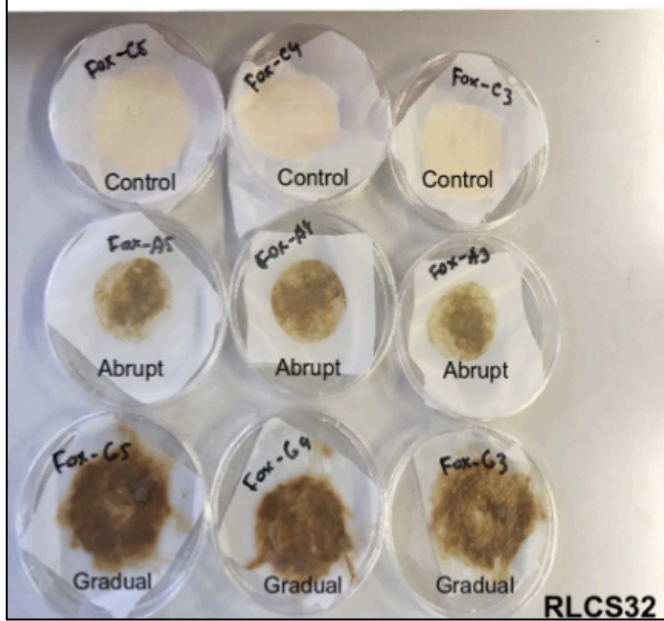

**Figure S2.** Effect of gradual vs. abrupt copper treatment on the mycelium pigmentation. Mycelium of fungus RLCS12 was darker under abrupt copper stress. Isolates RLCS05 and RLCS32 formed darker mycelium under gradual copper stress.
